# Supplementary material for: Synthesis and Electrical Properties of a New Bipolar Material Using Spacer Moiety
Source: MDPI journal article supplement (doi:10.3390/app14093593), 2024-04-24
Supplement: s1 [file s1]

## Supporting information

### Synthesis and Electrical Properties of a New Bipolar Material Using Spacer Moiety

Seunghyeon Jo<sup>1†</sup>, Sangwook Park<sup>1†</sup>, Hyukmin Kwon<sup>1</sup>, Hayoon Lee<sup>1</sup>, Kiho Lee<sup>1</sup>, and Jongwook Park<sup>1,\*</sup>

<sup>a</sup>Integrated Engineering, Department of Chemical Engineering, Kyung Hee University, Gyeonggi, 17104, Korea

\*E-mail: jongpark@khu.ac.kr

**Table S1.** Absorption frequencies and oscillator strengths calculated with TD-B3LYP/6-311G(d) for the DTPCZ

| Absorption      |             | Oscillator strength | Characteristic of transition | Contribution |
|-----------------|-------------|---------------------|------------------------------|--------------|
| Wavelength (nm) | Energy (eV) |                     |                              |              |
| 409.1           | 3.031       | 0.061               | HOMO→LUMO                    | 58.1         |
|                 |             |                     | HOMO→LUMO+1                  | 39.9         |
| 391.1           | 3.170       | 0.005               | HOMO→LUMO                    | 40.9         |
|                 |             |                     | HOMO→LUMO+1                  | 58.8         |
| 307.7           | 4.030       | 0.004               | HOMO-9→LUMO                  | 72.5         |
| 304.9           | 4.067       | 0.005               | HOMO-2→LUMO                  | 45.7         |
| 303.4           | 4.086       | 0.076               | HOMO→LUMO+2                  | 84.8         |
| 302.8           | 4.095       | 0.005               | HOMO-10→LUMO                 | 46.7         |
| 301.4           | 4.113       | 0.007               | HOMO-10→LUMO+1               | 31.7         |
|                 |             |                     | HOMO-2→LUMO+1                | 25.2         |
| 298.7           | 4.150       | 0.014               | HOMO-9→LUMO+1                | 85.7         |
| 294.7           | 4.207       | 0.116               | HOMO-2→LUMO                  | 24.0         |
|                 |             |                     | HOMO-2→LUMO+1                | 20.5         |
| 293.1           | 4.230       | 0.017               | HOMO-2→LUMO+1                | 38.2         |
| 289.5           | 4.282       | 0.010               | HOMO-2→LUMO+3                | 93.4         |

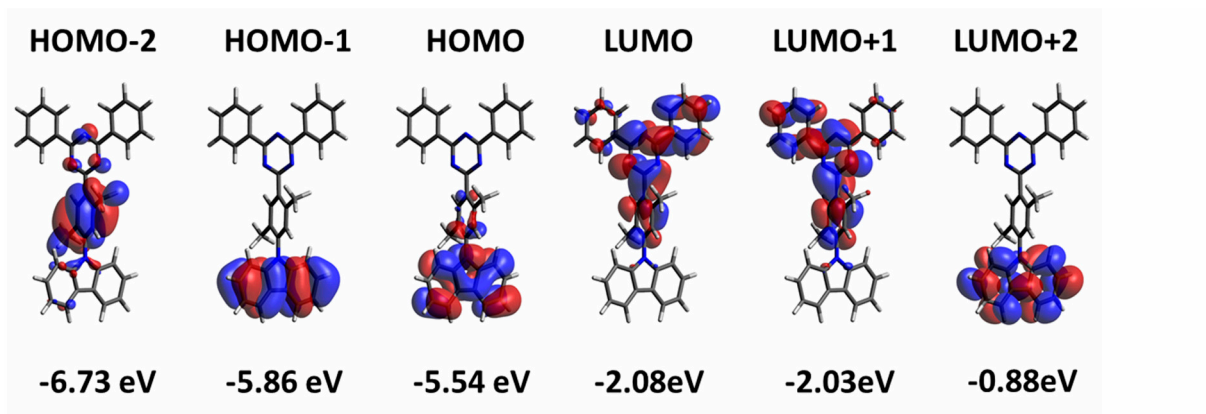

**Figure S1.** Electron density distributions of molecular orbitals of DTPCZ (calculated using the B3LYP/def2-TZVP method).

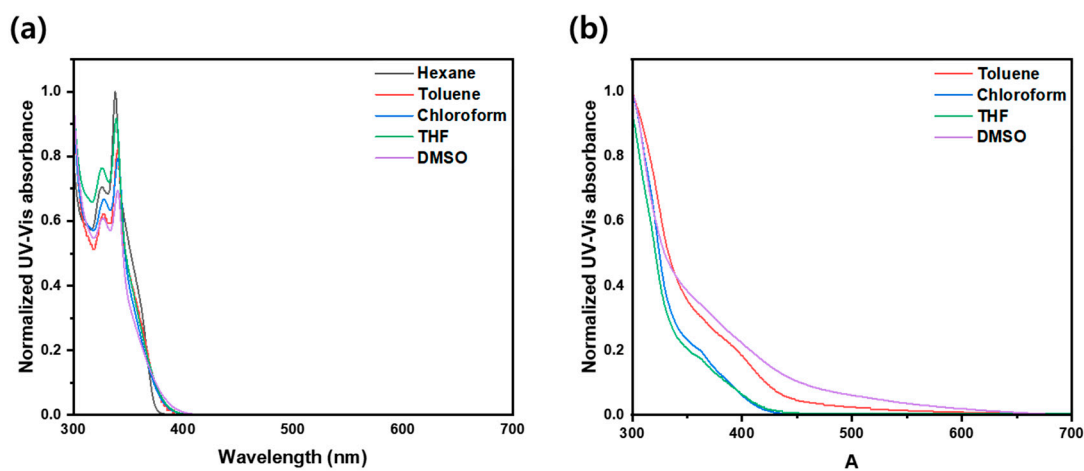

**Figure S2.** Normalized UV-Vis absorption spectra of (a) DTPCZ and (b) Poly DTPCZ according to different polarity of solvents at 0.5 wt%.

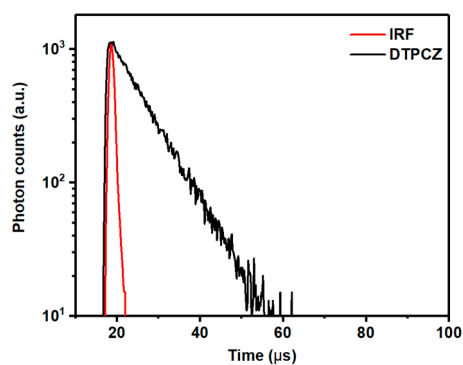

**Figure S3.** Transient photoluminescence decay spectra of the solution(toluene) (IRF: instruments response function). Range : 100  $\mu$ s.

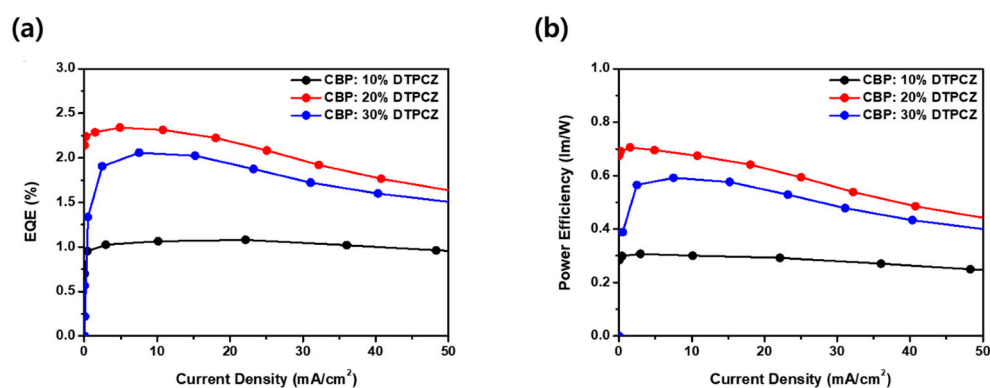

**Figure S4.** EL characteristics of devices using DTPCZ as EMLs dopant: (a) PE versus current density, and (b) EQE versus current density.

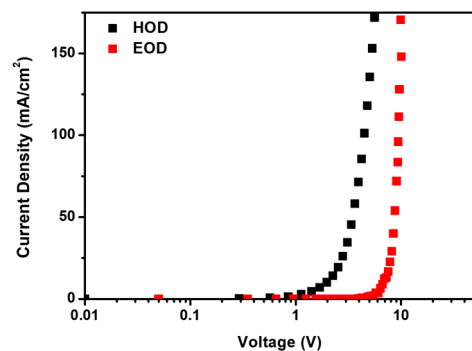

**Figure S5.** J-V characteristics of HOD and EOD of DTPCZ.

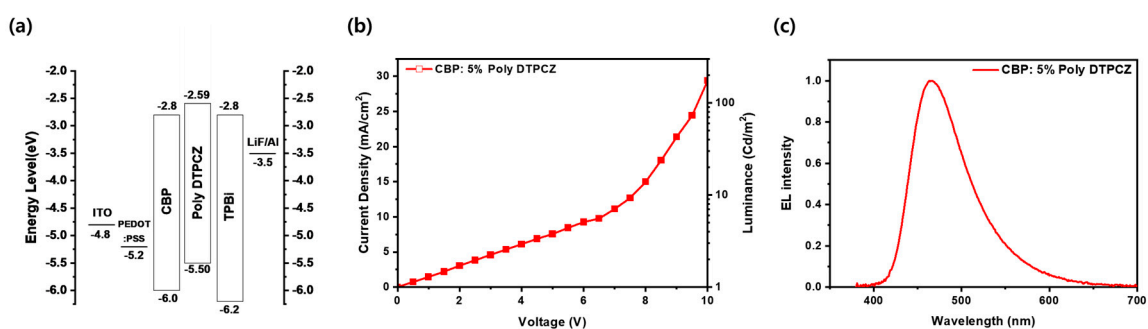

**Figure S6.** EL characteristics of devices using Poly DTPCZ as EMLs 5 wt% dopant: (a) band diagram of solution process OLED device, (b) J-V curve, (c) EL spectrum of doped device of Poly DTPCZ.

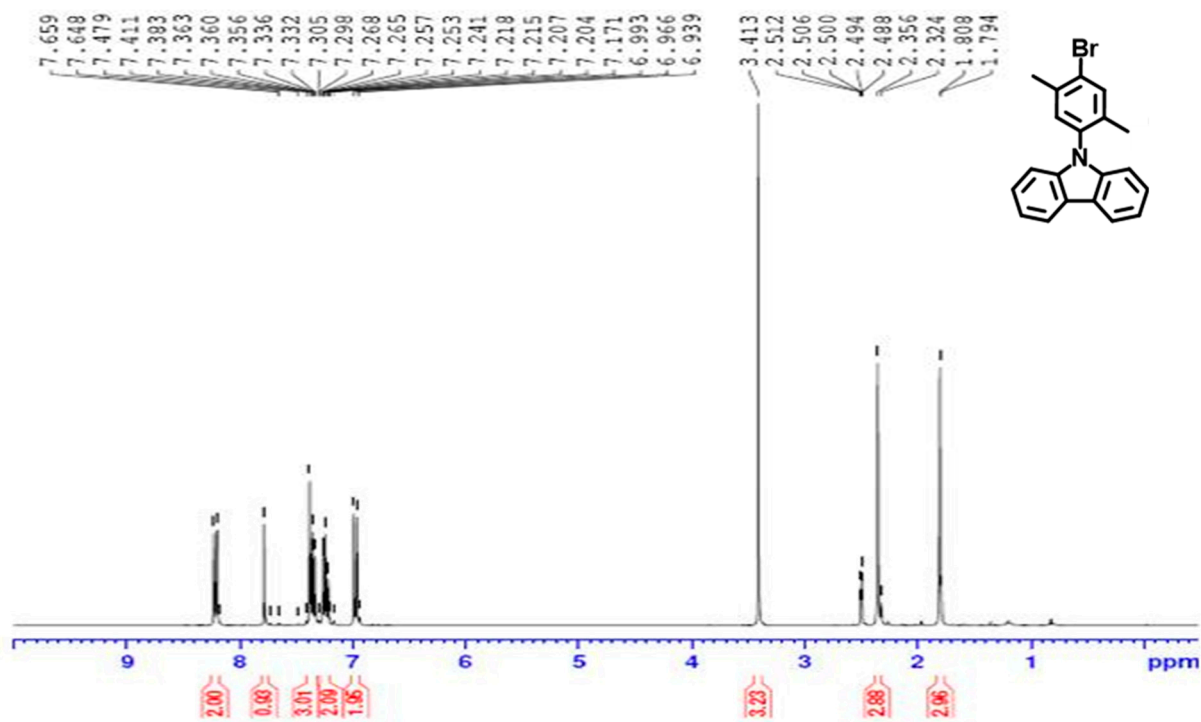

**Figure S7.** <sup>1</sup>H NMR spectra of compound (1) recorded in DMSO-d<sub>6</sub> (300 MHz)

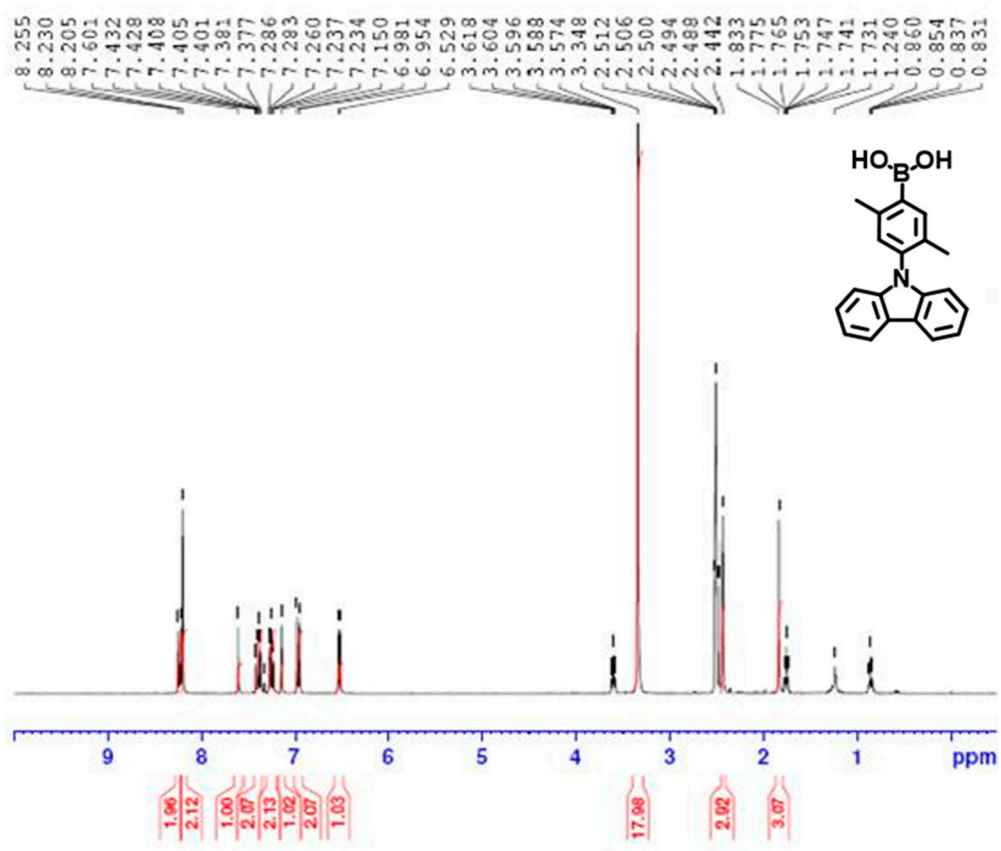

**Figure S8.** <sup>1</sup>H NMR spectra of compound (2) recorded in DMSO-d<sub>6</sub> (300 MHz)

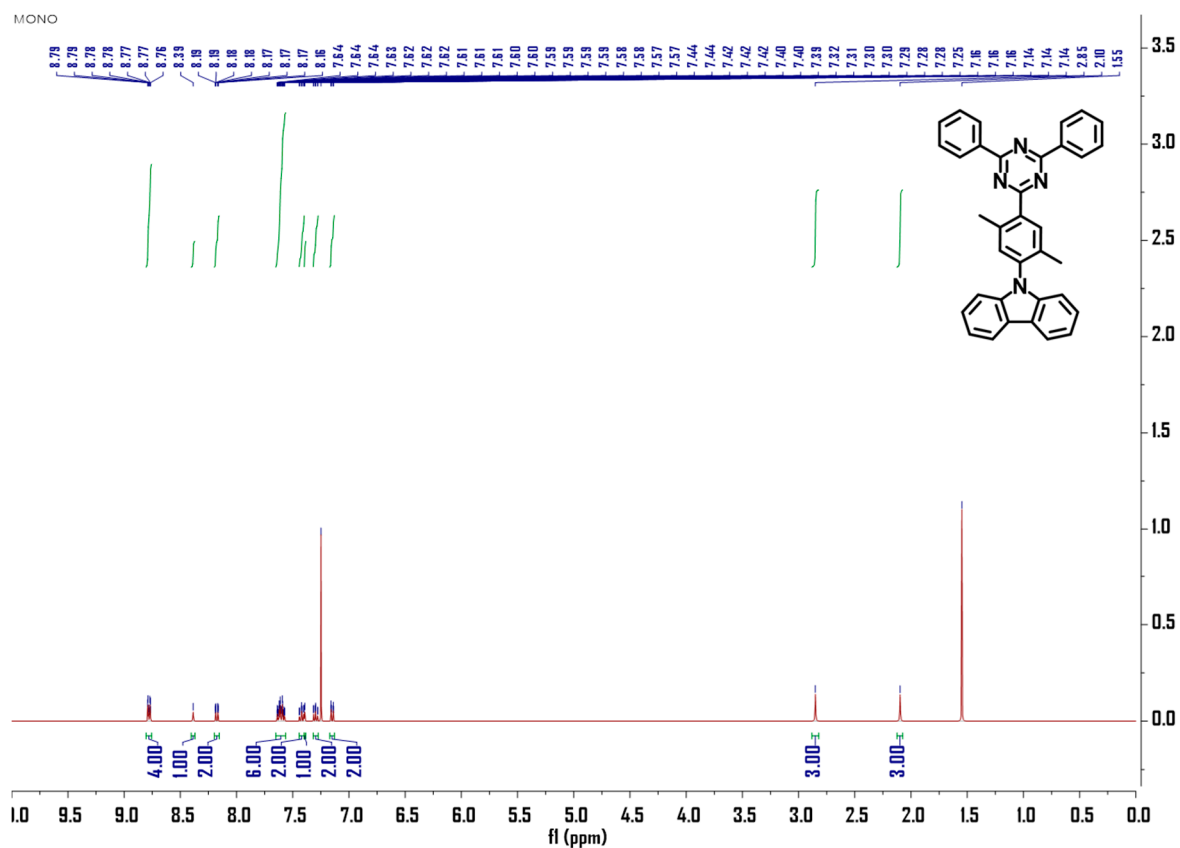

Figure S9.  $^1\text{H}$  NMR spectra of DTPCZ recorded in  $\text{CDCl}_3$  (400 MHz)

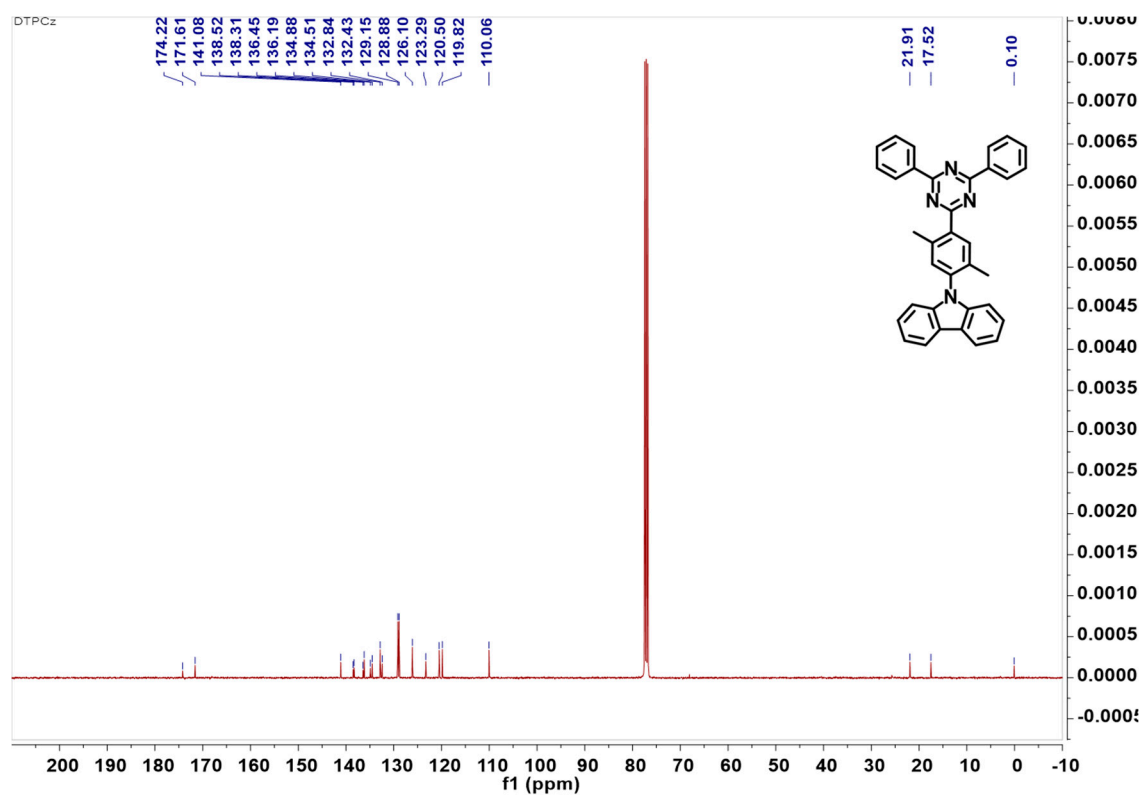

Figure S10.  $^{13}\text{C}$  NMR spectra of DTPCZ recorded in  $\text{CDCl}_3$  (100 MHz)

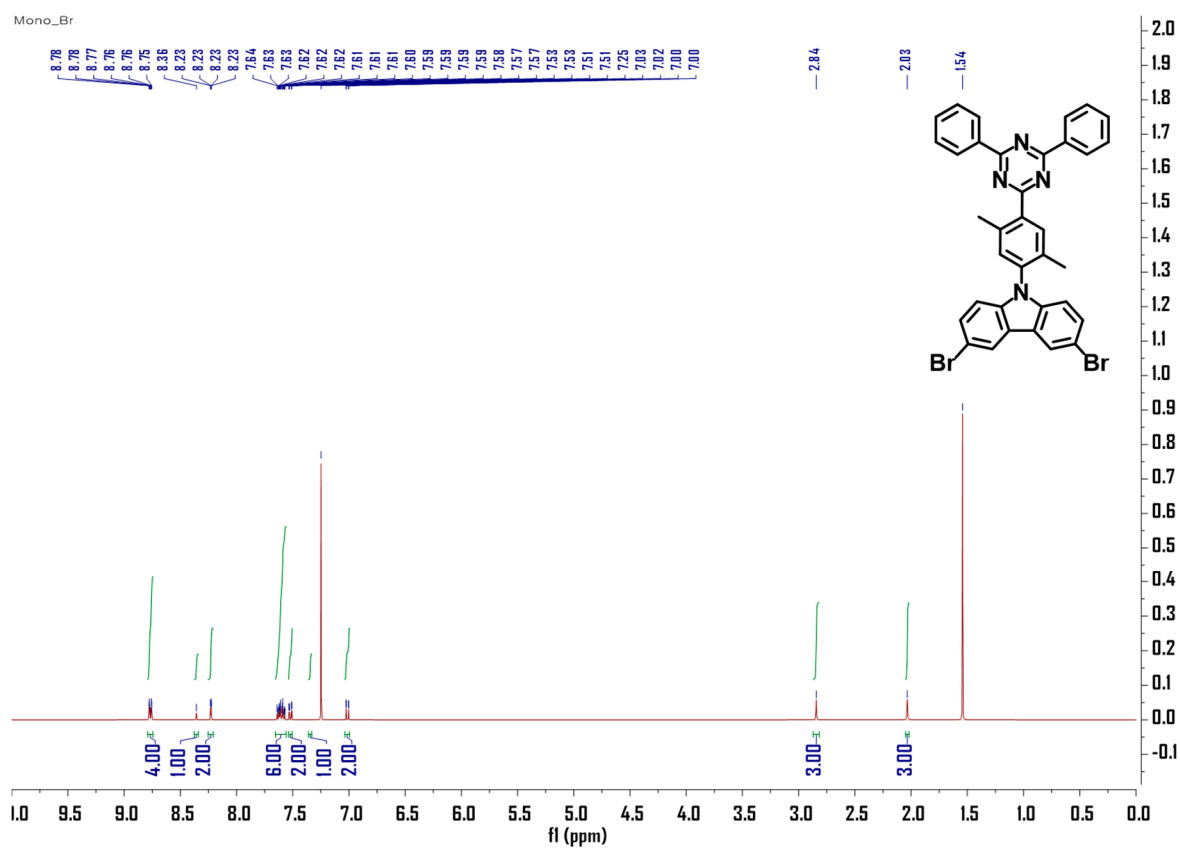

**Figure S11.** <sup>1</sup>H NMR spectra of compound (3) recorded in CDCl<sub>3</sub> (400 MHz)

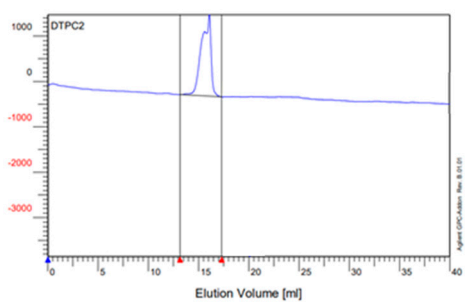

**Figure S12.** GPC traces of synthesized Poly DTPCZ using THF as eluent.
